# Supplementary material for: Arrival and diversification of mabuyine skinks (Squamata: Scincidae) in the Neotropics based on a fossil-calibrated timetree
Source: PeerJ journal article supplement (doi:10.7717/peerj.3194), 2017-04-18
Supplement: SM_1.pdf [file SM_1.pdf]

|                                | <i>12S rRNA</i> | <i>16S rRNA</i> | <i>cmos</i> | <i>cytb</i> | <i>enol</i> | <i>gapdh</i> | <i>gpr149</i> | <i>myh</i> |
|--------------------------------|-----------------|-----------------|-------------|-------------|-------------|--------------|---------------|------------|
| <i>Ablepharus</i>              | 34821616        | 49476602        | 2760966     | 49476366    | -           | -            | -             | -          |
| <i>Acontias</i>                | 33385521        | 33385469        | 334903274   | 238867256   | -           | 39545954     | -             | 82549050   |
| <i>Afroablepharus</i>          | 34821618        | 34821532        | 158121080   | 158121062   | -           | -            | -             | -          |
| <i>Amphiglossus</i>            | 38884825        | 255766973       | 38884934    | 38884885    | 40068155    | 39545962     | 392936187     | -          |
| <i>Anomalopus</i>              | 321271330       | 30691204        | 334903276   | -           | -           | -            | -             | -          |
| <i>Aspronema cochabambae</i>   | 17221682        | 17221687        | -           | -           | -           | -            | -             | -          |
| <i>Aspronema dorsivittatum</i> | 82548850        | 387166131       | 82548407    | 82548729    | 82549024    | 82548569     | -             | 82549054   |
| <i>Ateuchosaurus</i>           | 61102831        | -               | 61102774    | 238867260   | -           | -            | -             | -          |
| <i>Bassiana</i>                | 61102827        | -               | 334903280   | 61102873    | -           | -            | -             | -          |
| <i>Bellatorias</i>             | -               | -               | 334903282   | -           | -           | -            | -             | -          |
| <i>Brachymeles</i>             | 55831606        | 34821426        | 61102788    | 238867262   | 321494418   | -            | 392936207     | -          |
| <i>Brasiliscincus agilis</i>   | 82548827        | 33334964        | 82548501    | 185179442   | 82548926    | 82548588     | -             | 82549090   |
| <i>Brasiliscincus caissara</i> | 33334946        | 33334963        | -           | -           | -           | -            | -             | -          |
| <i>Brasiliscincus heathi</i>   | 82548852        | 33334961        | 82548489    | 82548771    | 82548970    | 82548609     | -             | 82549170   |
| <i>Caledoniscincus</i>         | 190147915       | 190147906       | 334903284   | 190147817   | -           | -            | -             | -          |
| <i>Calyptotis</i>              | 30691165        | 34821427        | -           | 24110612    | -           | -            | -             | -          |
| <i>Carlia</i>                  | 30691152        | 56567390        | 61102768    | 5881289     | -           | 85692054     | -             | -          |
| <i>Celatiscincus</i>           | -               | -               | 113015800   | -           | -           | -            | -             | -          |
| <i>Chalcides</i>               | 55831607        | 410111711       | 410111633   | 238867264   | -           | -            | 410111646     | -          |
| <i>Chioninia coctei</i>        | 22657712        | -               | -           | 18000927    | -           | -            | -             | -          |
| <i>Chioninia delalandii</i>    | 27447024        | 27447041        | 13446889    | 13624817    | -           | -            | -             | -          |
| <i>Chioninia fogoensis</i>     | 22657706        | 37722632        | 13446893    | 18000906    | -           | -            | -             | -          |
| <i>Chioninia nicolauensis</i>  | -               | -               | -           | 18000911    | -           | -            | -             | -          |
| <i>Chioninia spinalis</i>      | 27447007        | 27447028        | 13446895    | 13624793    | -           | -            | -             | -          |
| <i>Chioninia stangeri</i>      | 22657695        | 37722630        | 13446901    | 13624799    | -           | -            | -             | -          |
| <i>Chioninia vaillantii</i>    | 22657726        | 37722634        | 13446899    | 18000964    | -           | -            | -             | -          |
| <i>Coeranoscincus</i>          | 30691166        | 30691206        | -           | -           | -           | -            | -             | -          |
| <i>Coggeria</i>                | 115501531       | 115501555       | -           | -           | -           | -            | -             | -          |

|                                    |           |           |           |           |          |           |           |          |
|------------------------------------|-----------|-----------|-----------|-----------|----------|-----------|-----------|----------|
| <i>Copeoglossum aurae</i>          | 387860912 | 387860931 | -         | 341957017 | -        | -         | -         | -        |
| <i>Copeoglossum nigropunctatum</i> | 27447014  | 33334958  | -         | 185179474 | -        | -         | 635718039 | -        |
| <i>Corucia</i>                     | 34821625  | 34821431  | 334903286 | -         | -        | -         | -         | -        |
| <i>Cryptoblepharus</i>             | 34821626  | 34821432  | 113015802 | 61102847  | -        | -         | -         | -        |
| <i>Ctenotus</i>                    | 30691167  | 34821434  | 61102778  | 258677519 | -        | 345450830 | -         | -        |
| <i>Cyclodomorphus</i>              | 34821629  | 34821435  | 334903288 | 18000622  | -        | -         | -         | -        |
| <i>Dasia grisea</i>                | 326652824 | 326652947 | -         | -         | -        | -         | 685806315 | -        |
| <i>Dasia haliana</i>               | 406356162 | 406356157 | -         | -         | -        | -         | -         | -        |
| <i>Dasia johnsinghi</i>            | 406356164 | 406356159 | -         | -         | -        | -         | -         | -        |
| <i>Dasia olivacea</i>              | 406356165 | 406356160 | -         | -         | -        | -         | -         | -        |
| <i>Dasia subcaerulea</i>           | 406356161 | 406356156 | -         | -         | -        | -         | -         | -        |
| <i>Dasia vittata</i>               | 8918288   | 8918299   | -         | -         | -        | -         | -         | -        |
| <i>Egernia</i>                     | 30691153  | 30691193  | 334903290 | 18000624  | -        | -         | -         | -        |
| <i>Emoia</i>                       | 33385532  | 9712366   | 33385290  | 1508798   | 33385418 | -         | 326653533 | -        |
| <i>Eremiascincus</i>               | 30691170  | 34821439  | 334903292 | -         | -        | -         | -         | -        |
| <i>Eugongylus</i>                  | 33385535  | 9712368   | 334903294 | 61102853  | 33385408 | -         | 392936179 | -        |
| <i>Eulamprus</i>                   | 30691172  | 30691213  | 61102776  | 14599369  | -        | -         | -         | -        |
| <i>Eumeces</i>                     | 37812359  | 410111718 | 11596347  | 82494565  | -        | 39545956  | 410111662 | -        |
| <i>Eumecia anchietae</i>           | 34821658  | 34821464  | -         | -         | -        | -         | -         | -        |
| <i>Eurylepis</i>                   | 410111730 | 410111719 | 410111637 | 410111749 | -        | -         | 410111660 | -        |
| <i>Eutropis beddomei</i>           | 380504933 | 380504928 | 380504905 | -         | -        | -         | 685806325 | -        |
| <i>Eutropis bibronii</i>           | 380504942 | 380504926 | 380504907 | -         | -        | -         | 685806327 | -        |
| <i>Eutropis bontocensis</i>        | -         | -         | -         | -         | -        | -         | 685806331 | -        |
| <i>Eutropis carinata</i>           | 37724216  | 37724266  | 380504895 | -         | -        | -         | 685806337 | -        |
| <i>Eutropis clivicola</i>          | 380504941 | 380504919 | 380504903 | -         | -        | -         | 685806347 | -        |
| <i>Eutropis cumingi</i>            | 82548838  | 82548355  | 82548465  | 82548705  | 82548948 | -         | 685806357 | 82549110 |
| <i>Eutropis dissimilis</i>         | 37724218  | 37724268  | -         | -         | -        | -         | -         | -        |
| <i>Eutropis grandis</i>            | -         | -         | -         | -         | -        | -         | 685806485 | -        |
| <i>Eutropis indeprensa</i>         | 37724219  | 37724269  | -         | -         | -        | -         | 685806375 | -        |
| <i>Eutropis longicaudata</i>       | 27447021  | 82548357  | 171345046 | 345523773 | -        | -         | 685806399 | 82549114 |

|                                  |           |           |           |           |           |          |           |          |
|----------------------------------|-----------|-----------|-----------|-----------|-----------|----------|-----------|----------|
| <i>Eutropis macularia</i>        | 440495506 | 18147747  | 82548463  | 82548703  | 82548946  | 82548598 | 685806405 | 82549108 |
| <i>Eutropis madaraszi</i>        | 37724223  | 37724273  | -         | -         | -         | -        | 685806495 | -        |
| <i>Eutropis multicarinata</i>    | 37724224  | 37724274  | 113015770 | -         | -         | -        | 685806439 | -        |
| <i>Eutropis multifasciata</i>    | 37724228  | 37724281  | 42521179  | 82548707  | 82548950  | -        | 326653541 | 82549112 |
| <i>Eutropis nagarjunensis</i>    | 380504935 | 380504915 | 380504911 | -         | -         | -        | 685806453 | -        |
| <i>Eutropis quadricarinata</i>   | 37724232  | 37724282  | -         | -         | -         | -        | 685806457 | -        |
| <i>Eutropis rudis</i>            | 82548836  | 82548353  | 82548461  | 82548701  | 82548944  | 82548597 | 685806459 | 82549106 |
| <i>Eutropis rugifera</i>         | 37724233  | 37724286  | -         | -         | -         | -        | 685806343 | -        |
| <i>Eutropis trivittata</i>       | 380504934 | 380504914 | 380504909 | -         | -         | -        | 685806475 | -        |
| <i>Eutropis tyleri</i>           | 37724217  | 37724267  | -         | -         | -         | -        | -         | -        |
| <i>Exila nigropalmata</i>        | 187763970 | -         | -         | 187763973 | -         | -        | -         | -        |
| <i>Feylinia</i>                  | 83853974  | 34821466  | 33385260  | 83853958  | 33385396  | -        | 392936195 | -        |
| <i>Glaphyromorphus</i>           | 321271331 | 115501560 | -         | -         | -         | -        | -         | -        |
| <i>Gongylomorphus</i>            | 55831623  | 34821469  | 61102792  | 225728549 | -         | -        | -         | -        |
| <i>Graciliscincus</i>            | -         | -         | 113015764 | -         | -         | -        | -         | -        |
| <i>Hakaria</i>                   | 55831624  | 34821537  | 61102808  | 238867272 | -         | -        | -         | -        |
| <i>Hemiergus</i>                 | 321271315 | 34821470  | 334903296 | -         | -         | -        | -         | -        |
| <i>Hemisphaeriodon</i>           | 34821665  | 34821471  | -         | -         | -         | -        | -         | -        |
| <i>Heremites auratus</i>         | 391324541 | 37724263  | -         | 37722676  | -         | -        | -         | -        |
| <i>Heremites septemtaeniatus</i> | 37724234  | -         | -         | -         | -         | -        | -         | -        |
| <i>Heremites vittatus</i>        | 391324552 | 37724291  | -         | 185179522 | -         | -        | -         | -        |
| <i>Insulasaurus</i>              | -         | -         | -         | -         | -         | -        | 326653555 | -        |
| <i>Isopachys</i>                 | 9712344   | 9712370   | -         | -         | -         | -        | -         | -        |
| <i>Janetaescincus</i>            | 55831625  | 55831666  | 61102800  | 238867268 | -         | -        | 319878875 | -        |
| <i>Kanakysaurus</i>              | -         | -         | 113015680 | -         | -         | -        | -         | -        |
| <i>Lacertaspis</i>               | 34821677  | 34821482  | -         | -         | -         | -        | -         | -        |
| <i>Lacertoides</i>               | -         | -         | 113015684 | -         | -         | -        | -         | -        |
| <i>Lamprolepis</i>               | 33385531  | 33385481  | 334903298 | 33386012  | 321494400 | 82548576 | -         | 82549068 |
| <i>Lampropholis</i>              | 190148004 | 56567391  | 113015686 | 61102875  | 298349063 | 41584461 | 298349022 | -        |
| <i>Lankascincus</i>              | 34821681  | 34821486  | -         | -         | -         | -        | -         | -        |

|                              |           |           |           |           |           |           |           |           |
|------------------------------|-----------|-----------|-----------|-----------|-----------|-----------|-----------|-----------|
| <i>Larutia</i>               | -         | -         | -         | -         | 321494405 | -         | -         | -         |
| <i>Leiolopisma</i>           | 34821682  | 34821487  | 113015774 | 61102857  | -         | -         | -         | -         |
| <i>Lepidophyma</i>           | 297185185 | 33385518  | 33385342  | 166077463 | 297185414 | 297185310 | -         | -         |
| <i>Lepidothyris</i>          | 30691157  | 34821512  | -         | -         | -         | -         | -         | -         |
| <i>Leptosiaphos</i>          | 34821690  | 34821490  | 158121088 | -         | -         | -         | -         | -         |
| <i>Liopholis</i>             | -         | -         | 334903302 | -         | -         | -         | -         | -         |
| <i>Lioscincus</i>            | 194396027 | 194396022 | 113015692 | 194396016 | -         | -         | -         | -         |
| <i>Lipinia</i>               | 326652838 | 9712372   | 334903304 | -         | 321494399 | -         | 326653557 | -         |
| <i>Lissolepis</i>            | -         | -         | 334903306 | -         | -         | -         | -         | -         |
| <i>Lygisaurus</i>            | 33385538  | 33385488  | 33385282  | 33386026  | 33385412  | -         | -         | -         |
| <i>Lygosoma</i>              | 34821715  | 9712375   | 334903308 | -         | 321494406 | -         | -         | -         |
| <i>Mabuya berengerae</i>     | 635717470 | -         | -         | 635172943 | -         | -         | 635718023 | -         |
| <i>Mabuya dominicana</i>     | 387860918 | 387860937 | -         | 387860882 | -         | -         | -         | 387860849 |
| <i>Mabuya mabouya</i>        | 326652840 | 27447037  | -         | 185179468 | -         | -         | 326653561 | -         |
| <i>Mabuya meridensis</i>     | 635717483 | -         | -         | 185179470 | -         | -         | 635718035 | -         |
| <i>Mabuya pergravis</i>      | 635717490 | -         | -         | 635172985 | -         | -         | 635718041 | -         |
| <i>Mabuya zuliae</i>         | 185536533 | -         | -         | 185179504 | -         | -         | -         | -         |
| <i>Madascincus</i>           | 255766969 | 255766981 | 256009925 | -         | 255766941 | -         | 319878853 | -         |
| <i>Manciola guaporicola</i>  | 82548842  | 82548387  | 82548473  | 185179464 | 82549010  | 82548630  | -         | 82549168  |
| <i>Marisora alliacea</i>     | 185536525 | -         | -         | -         | -         | -         | -         | -         |
| <i>Marisora aurulae</i>      | 27447019  | -         | -         | -         | -         | -         | -         | -         |
| <i>Marisora brachypoda</i>   | -         | -         | -         | 185179492 | -         | -         | -         | -         |
| <i>Marisora falconensis</i>  | 635717479 | -         | -         | 185179454 | -         | -         | 635718029 | -         |
| <i>Marisora roatanae</i>     | 387860928 | 387860946 | -         | 387860902 | -         | -         | -         | -         |
| <i>Marisora unimarginata</i> | 326652841 | 18147746  | -         | 185179488 | -         | -         | 326653563 | -         |
| <i>Marmorosphax</i>          | 190147916 | 190147909 | 113015716 | 190147809 | -         | -         | -         | -         |
| <i>Melanoseps</i>            | 83853978  | 33385497  | 33385300  | 83853964  | 33385424  | -         | 319878881 | -         |
| <i>Menetia</i>               | -         | 218158441 | -         | -         | -         | -         | -         | -         |
| <i>Mesoscincus</i>           | 55831617  | 34821527  | -         | -         | -         | -         | 319878883 | -         |
| <i>Mochlus</i>               | 34821719  | 34821523  | -         | -         | -         | -         | 319878877 | -         |

|                                  |           |           |           |           |           |          |           |           |
|----------------------------------|-----------|-----------|-----------|-----------|-----------|----------|-----------|-----------|
| <i>Morethia</i>                  | 30691160  | 190147910 | 334903310 | 190147807 | -         | -        | -         | -         |
| <i>Nangura</i>                   | 30691181  | 323146364 | 334903312 | -         | -         | -        | -         | -         |
| <i>Nannoscincus</i>              | 190147917 | 190147908 | 113015720 | 190147811 | -         | -        | -         | -         |
| <i>Niveoscincus</i>              | 190148003 | 34821528  | 334903314 | 61102871  | -         | -        | -         | -         |
| <i>Notomabuya frenata</i>        | 82548829  | 82548391  | 82548521  | 185179460 | 82548930  | 82548590 | -         | 82549092  |
| <i>Notoscincus</i>               | 30691182  | 34821529  | 334903316 | -         | -         | -        | -         | -         |
| <i>Oligosoma</i>                 | 52630409  | 34821530  | 334903318 | 61102867  | 194396044 | -        | -         | -         |
| <i>Ophiomorus</i>                | 55831629  | 55831670  | -         | 157502921 | -         | -        | 319878885 | -         |
| <i>Ophioscincus</i>              | 115501540 | 30691223  | -         | -         | -         | -        | -         | -         |
| <i>Orosaura nebulosylvestris</i> | 185536540 | -         | -         | 185179510 | -         | -        | -         | -         |
| <i>Otosaurus</i>                 | -         | -         | -         | -         | -         | -        | -         | 326653565 |
| <i>Pamelaescincus</i>            | 55831630  | 34821531  | 61102802  | 18000620  | -         | -        | -         | -         |
| <i>Panaspis</i>                  | 326652844 | 34821534  | -         | -         | -         | -        | 326653569 | -         |
| <i>Panopa carvalhoi</i>          | 82548887  | 82548404  | 82548561  | 185179450 | 82549044  | 82548644 | -         | 82549196  |
| <i>Panopa croizati</i>           | 185536514 | -         | -         | 185179452 | -         | -        | -         | -         |
| <i>Papuascincus</i>              | 115501533 | 115501557 | -         | -         | -         | -        | 326653573 | -         |
| <i>Paraontias</i>                | 38884838  | 255766984 | 38884952  | 38884907  | 40068173  | 39545971 | 319878887 | -         |
| <i>Parvosincus</i>               | 326652871 | 326652999 | -         | -         | -         | -        | 326653621 | -         |
| <i>Phoboscincus</i>              | -         | -         | 113015736 | -         | -         | -        | -         | -         |
| <i>Pinoyscincus</i>              | -         | -         | -         | -         | -         | -        | 326653677 | -         |
| <i>Plestiodon</i>                | 336359703 | 34821460  | 334903320 | 166077339 | 321494402 | -        | 75993593  | 82549202  |
| <i>Prasinohaema</i>              | 30691184  | 30691224  | 334903322 | -         | -         | -        | -         | -         |
| <i>Proablepharus</i>             | -         | -         | 334903324 | -         | -         | -        | -         | -         |
| <i>Proscelotes</i>               | 33385556  | 37723244  | 33385320  | 33386064  | 33385442  | -        | -         | -         |
| <i>Pseudemoia</i>                | 194396028 | 194396024 | -         | 194396020 | -         | -        | -         | -         |
| <i>Pseudoacontias</i>            | 37812364  | 37812318  | -         | -         | -         | -        | -         | -         |
| <i>Psychosaura agmosticha</i>    | 82548834  | 82548351  | 82548457  | 82548699  | 82548940  | 82548595 | -         | 82549104  |
| <i>Psychosaura macrorhyncha</i>  | 82548833  | 33334957  | 82548455  | 82548695  | 82548938  | 82548623 | -         | 82549160  |
| <i>Pygomeles</i>                 | 37812366  | 38884870  | 256009935 | 38884915  | 255766947 | -        | -         | -         |
| <i>Ristella</i>                  | 34821734  | 34821538  | -         | -         | -         | -        | -         | -         |

|                                  |           |           |           |           |           |          |           |           |
|----------------------------------|-----------|-----------|-----------|-----------|-----------|----------|-----------|-----------|
| <i>Saiphos</i>                   | 30691185  | 34821539  | -         | 24110636  | -         | -        | -         | -         |
| <i>Saproscincus</i>              | 194396029 | 56567411  | 149929157 | 194396018 | -         | 41584459 | -         | -         |
| <i>Scelotes</i>                  | 33385554  | 33385512  | 33385326  | 346986931 | 33385436  | 39545976 | -         | -         |
| <i>Scincella</i>                 | 321271332 | 34821546  | 334903328 | 283443082 | 321494404 | -        | 326653719 | -         |
| <i>Scincopus</i>                 | 55831634  | 410111716 | 410111635 | 410111743 | -         | -        | 410111658 | -         |
| <i>Scincus</i>                   | 33385549  | 18147743  | 33385306  | 18000626  | 33385430  | -        | 319879033 | -         |
| <i>Sepsina</i>                   | 33385548  | 33385499  | 33385304  | 33386048  | 33385428  | -        | -         | -         |
| <i>Sigaloseps</i>                | -         | -         | 113015740 | -         | -         | -        | -         | -         |
| <i>Simiscincus</i>               | -         | -         | 113015760 | -         | -         | -        | -         | -         |
| <i>Sphenomorphus</i>             | 30691187  | 9712382   | 334903332 | 166077355 | -         | -        | 392936183 | -         |
| <i>Spondylurus caicosae</i>      | 387860914 | 387860934 | -         | 387860876 | -         | -        | -         | -         |
| <i>Spondylurus culebrae</i>      | 387860917 | 387860936 | -         | 387860880 | -         | -        | -         | -         |
| <i>Spondylurus fulgidus</i>      | 387860919 | 387860938 | -         | 387860884 | -         | -        | -         | 387860855 |
| <i>Spondylurus lineolatus</i>    | 387860922 | 387860941 | -         | 387860890 | -         | -        | -         | 387860857 |
| <i>Spondylurus macleani</i>      | 387860923 | 387860942 | -         | 387860892 | -         | -        | -         | 387860859 |
| <i>Spondylurus monitae</i>       | 387860924 | 387860943 | -         | 387860894 | -         | -        | -         | -         |
| <i>Spondylurus powelli</i>       | 387860927 | 387860944 | -         | 387860898 | -         | -        | -         | 387860864 |
| <i>Spondylurus semitaeniatus</i> | 387860929 | 387860947 | -         | 387860904 | -         | -        | -         | -         |
| <i>Spondylurus sloanii</i>       | 185536523 | 387860949 | -         | 185179482 | -         | -        | -         | -         |
| <i>Tiliqua</i>                   | 33385539  | 18147744  | 7330371   | 33386028  | 33385414  | 82548616 | 392936217 | 82549148  |
| <i>Toenayar novemcarinata</i>    | -         | -         | -         | -         | -         | -        | 685806455 | -         |
| <i>Trachylepis acutilabris</i>   | 82548882  | 82548399  | 82548551  | 82548793  | 82549034  | -        | -         | 82549186  |
| <i>Trachylepis affinis</i>       | 9712349   | 37724335  | -         | 8885826   | -         | -        | -         | -         |
| <i>Trachylepis albilabris</i>    | 37724295  | 18147749  | -         | -         | -         | -        | -         | -         |
| <i>Trachylepis atlantica</i>     | 82548855  | 82548372  | 82548495  | 82548737  | 82548982  | 82548612 | -         | 82549140  |
| <i>Trachylepis aureopunctata</i> | 440495514 | 18147757  | 82548429  | 82548669  | 82548912  | 82548581 | -         | 82549076  |
| <i>Trachylepis binotata</i>      | 440495487 | 8885801   | 440495408 | -         | -         | -        | -         | -         |
| <i>Trachylepis boettgeri</i>     | 440495491 | 27447035  | 82548431  | 82548671  | 82548914  | 82548582 | -         | 82549078  |
| <i>Trachylepis brevicollis</i>   | 62637842  | 62637844  | -         | 62637847  | -         | -        | -         | -         |
| <i>Trachylepis capensis</i>      | 82548879  | 82548396  | 82548545  | 82548787  | 82549028  | 82548639 | -         | 82549182  |

|                                     |           |           |           |           |          |          |           |          |
|-------------------------------------|-----------|-----------|-----------|-----------|----------|----------|-----------|----------|
| <i>Trachylepis comorensis</i>       | 440495497 | 8885804   | 440495422 | 301032911 | -        | -        | -         | -        |
| <i>Trachylepis cristinae</i>        | 391324544 | 391324557 | -         | -         | -        | -        | -         | -        |
| <i>Trachylepis dumasi</i>           | 440495511 | 82548339  | 82548433  | 82548673  | 82548916 | 82548583 | -         | 82549080 |
| <i>Trachylepis elegans</i>          | 440495479 | 18147748  | 82548435  | 82548675  | 82548918 | 82548584 | -         | 82549082 |
| <i>Trachylepis gravenhorstii</i>    | 440495466 | 82548341  | 82548437  | 82548677  | 82548920 | 82548585 | -         | 82549084 |
| <i>Trachylepis hoeschi</i>          | 33385537  | 33385487  | 33385280  | 33386024  | 82548976 | 82548611 | -         | 82549138 |
| <i>Trachylepis homalocephala</i>    | 82548817  | 82548334  | 82548423  | 82548663  | 82548906 | 82548578 | -         | 82549072 |
| <i>Trachylepis infralineata</i>     | -         | -         | -         | 301032961 | -        | -        | -         | -        |
| <i>Trachylepis irregularis</i>      | 27447009  | 8885810   | -         | -         | -        | -        | -         | -        |
| <i>Trachylepis maculilabris</i>     | 440495500 | 18147750  | 440495426 | 18000838  | -        | -        | -         | -        |
| <i>Trachylepis madagascariensis</i> | 440495480 | 82548342  | 82548439  | 82548679  | 82548922 | 82548586 | -         | 82549086 |
| <i>Trachylepis margaritifera</i>    | 22657666  | 37722624  | -         | 18000834  | -        | -        | -         | -        |
| <i>Trachylepis nancycoutuae</i>     | 440495470 | -         | -         | -         | -        | -        | -         | -        |
| <i>Trachylepis occidentalis</i>     | 82548883  | 323134846 | 82548553  | 82548795  | 82549036 | -        | -         | 82549188 |
| <i>Trachylepis ozorii</i>           | -         | -         | -         | 301032999 | -        | -        | -         | -        |
| <i>Trachylepis perrotetii</i>       | 326652937 | 18147754  | 82548479  | 82548719  | 82548956 | 82548600 | 326653761 | 82549124 |
| <i>Trachylepis polytropis</i>       | 18147738  | 18147753  | -         | -         | -        | -        | -         | -        |
| <i>Trachylepis punctatissima</i>    | -         | -         | 82795112  | 82795216  | -        | -        | -         | -        |
| <i>Trachylepis quinquetaeniata</i>  | 82548841  | 82548365  | 82548555  | 185179524 | 82549038 | 82548577 | 392936229 | 82549128 |
| <i>Trachylepis sechellensis</i>     | 22657664  | -         | 61102772  | 18000632  | -        | -        | -         | -        |
| <i>Trachylepis socotrana</i>        | 391324546 | 391324559 | -         | 18000842  | -        | -        | -         | -        |
| <i>Trachylepis spilogaster</i>      | 33385533  | 33385483  | 33385272  | 33386016  | 33385404 | 39545955 | -         | -        |
| <i>Trachylepis striata</i>          | 33385540  | 33385490  | 33385286  | 33386030  | 33385416 | 82548615 | -         | 82549146 |
| <i>Trachylepis sulcata</i>          | 440495485 | 8885822   | 440495406 | 37722646  | -        | -        | -         | -        |
| <i>Trachylepis tandrefana</i>       | 440495462 | -         | 440495370 | -         | -        | -        | -         | -        |
| <i>Trachylepis tavaratra</i>        | 440495518 | -         | 440495458 | -         | -        | -        | -         | -        |
| <i>Trachylepis tessellata</i>       | 391324549 | 391324562 | -         | -         | -        | -        | -         | -        |
| <i>Trachylepis varia</i>            | 440495493 | 8885823   | 440495418 | 301032989 | -        | -        | -         | -        |
| <i>Trachylepis variegata</i>        | 82548880  | 82548397  | 82548547  | 82548789  | 82549030 | 82548640 | -         | 82549184 |
| <i>Trachylepis vato</i>             | 440495464 | 37724290  | 82548441  | 82548681  | 82548924 | 82548587 | -         | 82549088 |

|                             |           |           |           |           |           |           |           |          |
|-----------------------------|-----------|-----------|-----------|-----------|-----------|-----------|-----------|----------|
| <i>Trachylepis vezo</i>     | 440495517 | -         | -         | -         | -         | -         | -         | -        |
| <i>Trachylepis wrightii</i> | 440495499 | 37722623  | 61102770  | 18000634  | -         | -         | -         | -        |
| <i>Tribolonotus</i>         | 30691162  | 34821567  | 334903336 | 300430396 | -         | -         | -         | -        |
| <i>Tropidophorus</i>        | 34821765  | 9712385   | 113015776 | -         | -         | -         | -         | -        |
| <i>Tropidoscincus</i>       | -         | -         | 113015748 | -         | -         | -         | -         | -        |
| <i>Typhlacontias</i>        | 83853976  | 33385501  | 33385302  | 83853962  | 33385432  | -         | -         | -        |
| <i>Typhlosaurus</i>         | 33385522  | 323135036 | 33385250  | 323134931 | -         | 82548568  | 319879037 | 82549052 |
| <i>Tythoscincus</i>         | -         | -         | -         | -         | -         | -         | 326653773 | -        |
| <i>Varzea altamazonica</i>  | 635717462 | -         | -         | 187763971 | -         | -         | 635718019 | -        |
| <i>Varzea bistriata</i>     | 635717472 | 387860932 | 82548449  | 185179448 | 82548932  | 82548643  | 635718027 | 82549062 |
| <i>Voeltzkowia</i>          | 38884840  | 37812321  | 38884954  | 38884913  | 40068175  | 39545974  | 319879039 | -        |
| <i>Xantusia</i>             | 33385566  | 33385517  | 161177426 | 163890085 | 297185444 | 321440652 | -         | -        |
